# Supplementary material for: Fluctuation of intraocular pressure in glaucoma patients before and after trabeculectomy with mitomycin C
Source: PLoS One. 2017 Oct 4;12(10):e0185246. doi: 10.1371/journal.pone.0185246 (PMC5627910; doi:10.1371/journal.pone.0185246)
Supplement: S1 Table — (XLSX) [file pone.0185246.s001.xlsx]

## Sheet: Tabelle_Einzelmessung_Fluktuati
Nr	Geschl	CCT_StudAu	HD	Stud_Aug	Tmax	Med_prae_StudAu	Med_post_StudAu	SL	5FU	Need_StudAu	StudAu_prae_Tag1_14	StudAu_prae_Tag1_18	StudAu_prae_Tag1_21	StudAu_prae_Tag1_00	StudAu_prae_Tag2_8	StudAu_prae_Tag2_14	StudAu_prae_Tag2_18	StudAu_prae_Tag2_21	StudAu_prae_Tag2_00	StudAu_prae_Tag3_8	StudAu_post_Tag1_14	StudAu_post_Tag1_18	StudAu_post_Tag1_21	StudAu_post_Tag1_00	StudAu_post_Tag2_8	StudAu_post_Tag2_14	StudAu_post_Tag2_18	StudAu_post_Tag2_21	StudAu_post_Tag2_00	StudAu_post_Tag3_8	StudAu_prae_MITTEL	StudAu_post_MITTEL	StudAu_prae_MITTEL_Tag	StudAu_prae_MITTEL_Nacht	StudAu_post_MITTEL_Tag	StudAu_post_MITTEL_Nacht	StudAu_prae_14_MITTEL	StudAu_prae_14_MITTEL	StudAu_prae_18_MITTEL	StudAu_post_18_MITTEL	StudAu_prae_21_MITTEL	StudAu_post_21_MITTEL	StudAu_prae_00_MITTEL	StudAu_post_00_MITTEL	StudAu_prae_8_MITTEL	StudAu_post_8_MITTEL	StudAu_prae_GESAMT_MAX	StudAu_prae_GESAMT_MIN	StudAu_prae_GESAMT_FLUKTUATION_MAX_MIN
1	männlich	518	Primäres Offenwinkelglaukom	rechtes Auge	24	3	2	2	1	1	10	11	10	17	14	14	12	10	13	12	15	13	13	15	15	12	16	10	15		12.3	13.7778	11.625	15	13.4286	15	12	13	13	14.5	10	11.5	15	15	13	15	17	10	7
2	weiblich	484	Pseudoexfoliationsglaukom	rechtes Auge	25	4	0	0	0	1	15	17	16	23		14	19	18	26			9	9	12	9	7	7	8	8		18.5	8.625	16.5	24.5	8.16667	10	14.5	15.5	18	8	17	8.5	24.5	10	#NULL!	9	26	14	12
3	weiblich	557	Primäres Offenwinkelglaukom	rechtes Auge	22	2	0	2	1	1	15	15	17	18	18	19	22	17	17		14	16	10	14	14	15	13	12	15		17.5556	13.6667	17.5714	17.5	13.4286	14.5	17	18	18.5	14.5	17	11	17.5	14.5	18	14	22	15	7
4	weiblich	547	Primäres Offenwinkelglaukom	rechtes Auge	28	4	1	1	0	1	19	22	13	13	22	16	15	14	14	18	19	12	14	17	16	17	17	19	21	13	16.6	16.5	17.375	13.5	15.875	19	17.5	18.5	17.5	14.5	13.5	16.5	13.5	19	20	14.5	22	13	9
8	weiblich	491	Primäres Offenwinkelglaukom	rechtes Auge	29	4	4	1	6	1	15	11	10	19	18	14	18	11	20	8	9	10	8	12	11	10	12	17	14	11	14.4	11.4	13.125	19.5	11	13	14.5	15.5	15.5	11	10.5	12.5	19.5	13	13	11	20	8	12
9	männlich	517	Primäres Offenwinkelglaukom	rechtes Auge	30	3	0	0	8	1	13	15	21	21	16	10	15	21	23			16	16	22	14	13	11	15	16		17.2222	15.375	15.8571	22	14.1667	19	11.5	12.5	12.5	13.5	21	15.5	22	19	16	14	23	10	13
10	weiblich	532	Normaldruckglaukom	rechtes Auge	21	2	0	1	2	1	15		9	13	14	9	8	8	12	11	10	8	10	12		11	10	8	10	8	11	9.66667	10.5714	12.5	9.28571	11	12	13	11	9	8.5	9	12.5	11	12.5	8	15	8	7
13	weiblich	533	Primäres Offenwinkelglaukom	rechtes Auge	30	3	0	0	1	2	23	23	16	12	22	26	21	16	15		20		18	18	21	21	22	19	17		19.3333	19.5	21	13.5	20.1667	17.5	24.5	25.5	23	22	16	18.5	13.5	17.5	22	21	26	12	14
14	männlich	485	Primäres Offenwinkelglaukom	rechtes Auge	26	2	0	0	3	1		14	13	16	13	17	13	12	13		13	15	14	12	10						13.875	12.8	13.6667	14.5	13	12	17	18	13.5	15	12.5	14	14.5	12	13	10	17	12	5
15	weiblich	545	Primäres Offenwinkelglaukom	rechtes Auge	25	3	0	0	1	1	19	18	14	16	16	14	17	19	18	19	5	5	7	9	6	7	8	5	8		17	6.66667	17	17	6.14286	8.5	16.5	17.5	15.5	6.5	16.5	6	17	8.5	17.5	6	19	14	5
17	männlich	486	Primäres Offenwinkelglaukom	rechtes Auge	25	3	1	2	5	2	20	21	13	14	19	19	27	12	16	18	22	17	14	17	13	16	13	16	13	13	17.9	15.4	18.625	15	15.5	15	19.5	20.5	24	15	12.5	15	15	15	18.5	13	27	12	15
19	weiblich	479	Pseudoexfoliationsglaukom	rechtes Auge	27	4	0	1	4	1	17	18	18	22	17	16	17	19	15	14		12	9	12	9	10	12	10	11	12	17.3	10.7778	17	18.5	10.5714	11.5	16.5	17.5	16	12	18.5	9.5	18.5	11.5	15.5	10.5	22	14	8
20	weiblich	500	Primäres Offenwinkelglaukom	rechtes Auge	20	4	0	1	4	1		13	14	17	11	16	18	14			8	7	8	8	7	7	6	8	7		14.7143	7.33333	14.3333	17	7.28571	7.5	16	17	16.5	6.5	14	8	17	7.5	11	7	18	11	7
24	weiblich	422	Primäres Offenwinkelglaukom	rechtes Auge	35	1	2	2	3	1	26	24	20	18	20	27	19	17	20	20	6	6	9	8	9	9	9	9	8	7	21.1	8	21.625	19	8	8	26.5	27.5	22	7.5	18.5	9	19	8	20	8	27	17	10
25	weiblich	562	Pigmentdispersionsglaukom	rechtes Auge	23	3	0	0	1	2	17	20	12	16	21	15	15	11	16	15	6	4	6	7	5						15.8	5.6	15.75	16	5.25	7	16	17	14	4	11.5	6	16	7	18	5	21	11	10
26	weiblich	516	Primäres Offenwinkelglaukom	rechtes Auge	26	4	1	2	3	1	18	19	18	19	17	18	18	18	19	17	17	14	17	16	17	18	14	16	17	18	18.1	16.4	17.875	19	16.375	16.5	18	19	12.5	14	18	16.5	19	16.5	17	17.5	19	17	2
27	männlich	526	Pseudoexfoliationsglaukom	rechtes Auge	19	4	0	0	4	1	16	15	15	15	11	15	19	16	15		8	7	8	8	7			10	8	10	15.2222	8.25	15.2857	15	8.33333	8	15.5	16.5	16	7	15.5	9	15	8	11	8.5	19	11	8
28	männlich	550	Primäres Offenwinkelglaukom	rechtes Auge	56	3	2	0	1	1	24	17	14	14	13	15	16	15	16	12	12	16	12	14	15	18	16	19	18	19	15.6	15.9	15.75	15	15.875	16	19.5	20.5	13.5	16	14.5	15.5	15	16	12.5	17	24	12	12
30	männlich	564	Primäres Offenwinkelglaukom	rechtes Auge	28	4	0	1	6	1		15	19	18	10	15	14	13	17	17	6	9	5	9	8	9	9	8	8		15.3333	7.88889	14.7143	17.5	7.71429	8.5	15	16	14.5	9	16	6.5	17.5	8.5	13.5	8	19	10	9
31	männlich	503	Pseudoexfoliationsglaukom	rechtes Auge	26	3	0	1	5	1	15	15	14	18	16	22	17	17	19	21	6	6	10	9	5	6	6	8	10		17.4	7.33333	17.125	18.5	6.71429	9.5	18.5	19.5	16	6	15.5	9	18.5	9.5	18.5	5	22	14	8
32	männlich	513	Pseudoexfoliationsglaukom	rechtes Auge	30	4	0	1	2	1	11	15	17	24	14	15	14	22	22	12	10	10	5	9	9	8	9	8	8		16.6	8.44444	15	23	8.42857	8.5	13	14	13.5	9.5	19.5	6.5	23	8.5	13	9	24	11	13
33	männlich	489	juveniles Glaukom	rechtes Auge	40	3	0	0	8	1	20	22	16	16	13	17	15	14	14	15	7	9	9	9	10	10	13	7	8		16.2	9.11111	16.5	15	9.28571	8.5	18.5	19.5	20.5	11	15	8	15	8.5	14	10	22	13	9
34	weiblich	567	Primäres Offenwinkelglaukom	rechtes Auge	25	3	0	0	0	1	18	16	18	18	14	20	21				10	9	8	10	8	10	11	9	12	6	17.8571	9.3	17.8333	18	8.875	11	19	20	17	10	18	8.5	18	11	14	7	21	14	7
35	weiblich	519	Primäres Offenwinkelglaukom	rechtes Auge	26	3	0	1	5	1	17		17	20	17	16	18	14	23		8	7	9	6	10	10	8	7	3		17.75	7.55556	16.5	21.5	8.42857	4.5	16.5	17.5	17	7.5	15.5	8	21.5	4.5	17	10	23	14	9
36	männlich	510	Pigmentdispersionsglaukom	rechtes Auge	40	4	0	0	4	1	24	21	15	13	19	18	14	17	17	22	14	11	12	9	10	9	9		10	9	18	10.3333	18.75	15	10.5714	9.5	21	22	17.5	10	16	12	15	9.5	20.5	9.5	24	13	11
37	weiblich	529	Primäres Offenwinkelglaukom	rechtes Auge	33	3	0	1	5	1	24	23	32	26	14	19	14	23	18	10	14	9	7	9	9	8	8	10	8		20.3	9.11111	19.875	22	9.28571	8.5	21.5	22.5	19	8.5	27.5	8.5	22	8.5	12	9	32	10	22
39	weiblich	527	Primäres Offenwinkelglaukom	rechtes Auge	22	4	0	0	5	1	18	21	13	14	17	21	19	14	10	12	10	10	10	11	12	12		12	11	15	15.9	11.4444	16.875	12	11.5714	11	19.5	20.5	20	10	13.5	11	12	11	14.5	13.5	21	10	11
40	weiblich	468	Pseudoexfoliationsglaukom	rechtes Auge	27	2	0	0	5	1	29	26	21	18	26	23	23	14	16	15	15	15	19	19	17	17	19	19	16		21.1	17.3333	22.125	17	17.2857	17.5	26	27	22.5	17	17.5	19	17	17.5	20.5	17	29	14	15
43	weiblich	525	Pigmentdispersionsglaukom	rechtes Auge	26	4	0	3	5	1	13	15	17	15	10	11	13	12	16	14	16	8	9	10	12	11	11	11			13.6	11	13.125	15.5	11.1429	10	12	13	14.5	9.5	14.5	10	15.5	10	12	12	17	10	7
46	männlich	553	Primäres Offenwinkelglaukom	rechtes Auge	30	4	0	2	10	1	14	11	14	18	12	15	16	12	16		12	14	16	15	18	21	18	16	11		14.2222	15.6667	13.4286	17	16.4286	13	14.5	15.5	13.5	16	13	16	17	13	12	18	18	11	7
48	weiblich	483	Primäres Offenwinkelglaukom	rechtes Auge	25	2	0	2	4	1	10		9	17	10	12	9	9	12	12	8	6	6	9	4	6	5	5	8	6	11.1111	6.3	10.1429	14.5	5.75	8.5	11	12	10	5.5	9	5.5	14.5	8.5	11	5	17	9	8
51	männlich	472	Pseudoexfoliationsglaukom	rechtes Auge	25	4	0	0	5	1	15	15	14	19	13	17	20	10	8	7		8	8	5	8	8	7	8	8		13.8	7.5	13.875	13.5	7.83333	6.5	16	17	13.5	7.5	12	8	13.5	6.5	10	8	20	7	13
52	weiblich	495	Pseudoexfoliationsglaukom	rechtes Auge	35	4	0	1	2	2		35	35	38	27	33	28	31	29		7	16	6	5	10	8	9	9	7		32	8.55556	31.5	33.5	9.28571	6	33	34	32.5	12.5	33	7.5	33.5	6	27	10	38	27	11
55	weiblich	582	juveniles Glaukom	rechtes Auge	28	3	0	1	10	1	11	13		21	19	13	11	13	21		5	8	6	11	6	6	9	7	10		15.25	7.55556	13.3333	21	6.71429	10.5	12	13	12.5	8.5	13	6.5	21	10.5	19	6	21	11	10
57	weiblich	514	Primäres Offenwinkelglaukom	rechtes Auge	25	4	0	1	4	1	17	16	13	17	12	16	14	25	22		11	10	13	15	12	12	10	13	11	10	16.8889	11.7	16.1429	19.5	11.375	13	16.5	17.5	16	10	19	13	19.5	13	12	11	25	12	13
62	weiblich	542	Primäres Offenwinkelglaukom	rechtes Auge	40	4	0	0	0	1	14	17	14	24	16	16	16	16	23		11	10	9	12	10	8	9	7	9		17.3333	9.44444	15.5714	23.5	9.14286	10.5	15	16	15.5	9.5	15	8	23.5	10.5	16	10	24	14	10
66	weiblich	539	Pseudoexfoliationsglaukom	rechtes Auge	48	3	0	0	4	1	25	30	18	21	18	23	24	21	20	12	12	14	16	11	13	9	13	13	14		21.2	12.7778	21.375	20.5	12.8571	12.5	24	25	23.5	13.5	19.5	14.5	20.5	12.5	15	13	30	12	18
67	weiblich	517	Primäres Offenwinkelglaukom	rechtes Auge	36	3	0	0	6	1	12	14	12	12		13	13	15	12		6	6	5	8	5	5	6	6	5		12.875	5.77778	13.1667	12	5.57143	6.5	12.5	13.5	14	6	13.5	5.5	12	6.5	#NULL!	5	15	12	3
68	weiblich	610	Pseudoexfoliationsglaukom	rechtes Auge	29	1	1	0	6	1	21	17	16	24	19	14	18	19	24		16	15	14	15	16	16	13	13	14		19.1111	14.6667	17.7143	24	14.7143	14.5	17.5	18.5	16	14	17.5	13.5	24	14.5	19	16	24	14	10
69	weiblich	598	Primäres Offenwinkelglaukom	rechtes Auge	28	4	1	2	0	1	20	21	19	20	22	20		21	25	26	19	19	16	18	15	18	18	18	20	15	21.5556	17.6	21.2857	22.5	17.25	19	20	21	21	18.5	20	17	22.5	19	24	15	26	19	7
72	weiblich	521	Pseudoexfoliationsglaukom	rechtes Auge	30	4	0	2	0	1	30	33	20	15	25	20	18	13	12	32	16	15		15	15	14	15		8		21.8	14	23.875	13.5	15	11.5	25	26	23.5	15	16.5	#NULL!	13.5	11.5	28.5	15	33	12	21
73	männlich	520	Primäres Offenwinkelglaukom	rechtes Auge	50	2	0	1	7	1	16	15	14	19	14	17	15	12	18	14	7	7	10	10	5	5	5	6	5	5	15.4	6.5	14.625	18.5	6.25	7.5	16.5	17.5	14.5	6	13	8	18.5	7.5	14	5	19	12	7
76	männlich	540	Primäres Offenwinkelglaukom	rechtes Auge	30	4	1	0	2	1		18	17	21	15	14	12	13	15		13	9	9	11	10	11	7	8	11		15.625	9.88889	14.8333	18	9.57143	11	14	15	16	8	15	8.5	18	11	15	10	21	12	9
78	weiblich	556	Primäres Offenwinkelglaukom	rechtes Auge	40	4	0	0	0	1	17	17	14	13	22	17	15	12	16		8	14	12		9	9	9	9	7		15.8889	9.625	16.2857	14.5	10	7	17	18	16.5	11.5	13	10.5	14.5	7	22	9	22	12	10
80	weiblich	625	Primäres Offenwinkelglaukom	rechtes Auge	28	3	0	0	3	1	14	15	12	12	14	15	16	12	13		15	14	11	12	17	18	15	11	12	16	13.6667	14.1	14	12.5	14.625	12	14.5	15.5	15	14.5	12	11	12.5	12	14	16.5	16	12	4
81	weiblich	548	Pseudoexfoliationsglaukom	rechtes Auge	22	4	0	0	5	1	23	21		20	10	13	18	12	19		16	22	21	20	15	18	18	17	18		17	18.3333	16.1667	19.5	18.1429	19	18	19	19	20	12	19	19.5	19	10	15	23	10	13
87	männlich	532	Pseudoexfoliationsglaukom	rechtes Auge	26	4	0	2	8	1	14	12	13	24	11	23	27	12	16		15	15	14	18	16	15	15	13	17	13	16.8889	15.1	16	20	14.5	17.5	18.5	19.5	22	15	12.5	13.5	20	17.5	11	14.5	27	11	16
89	weiblich	514	Primäres Offenwinkelglaukom	rechtes Auge	32	4	0	1	2	1	22	19	15	15	15	17	19	16	10	21	10	12	12	10	9	9	9	12	12		16.9	10.5556	18	12.5	10.4286	11	19.5	20.5	18.5	10.5	15.5	12	12.5	11	18	9	22	10	12
90	männlich	525	Pseudoexfoliationsglaukom	rechtes Auge	30	3	0	0	6	1	25	18	30	28	24	20	23	23	25		10	10	9	12	11	8	7	7	10		24	9.33333	23.2857	26.5	8.85714	11	22.5	23.5	18.5	8.5	26.5	8	26.5	11	24	11	30	18	12
91	weiblich	541	Primäres Offenwinkelglaukom	rechtes Auge	42	4	2	0	0	1	19	21	22	21	18	16	20	17	30		20	21	16	17	14	14	13	18	18	13	20.4444	16.4	19	25.5	16.125	17.5	17.5	18.5	20.5	17	19.5	17	25.5	17.5	18	13.5	30	16	14
5	weiblich	530	Primäres Offenwinkelglaukom	linkes Auge	24	1	0	3	2	1	15	12	14	17	15	16	15	8	15	7	10	9	8	6	9	9	9	8	5	9	13.4	8.2	12.75	16	8.875	5.5	15.5	16.5	13.5	9	11	8	16	5.5	11	9	17	7	10
6	weiblich	570	Normaldruckglaukom	linkes Auge	19	3	0	1	3	1	13	11	10	8	10	9	6	7	7	8	8	6	9	14	7	7	6	12	14		8.9	9.22222	9.25	7.5	7.85714	14	11	12	9.5	6	8.5	10.5	7.5	14	9	7	13	6	7
7	weiblich	446	Pigmentdispersionsglaukom	linkes Auge	26	4	0	0	10	1	11	14	12	14	12	12	11	9	17	8		3	2	2	3	4	3	2	3	2	12	2.66667	11.125	15.5	2.71429	2.5	11.5	12.5	13	3	10.5	2	15.5	2.5	10	2.5	17	8	9
11	weiblich	507	Primäres Offenwinkelglaukom	linkes Auge	30	3	0	2	1	1	22	20		24	22	17	17	14	10	16	10	12	17	15	15	11	10	11	14	17	18	13.2	18.2857	17	12.875	14.5	19.5	20.5	13.5	11	14	14	17	14.5	19	16	24	10	14
12	weiblich	561	Primäres Offenwinkelglaukom	linkes Auge	29	2	0	1	5	1	22	33	20	18	20	15	19	20	21	22	16	12	13	13	19	16	13		14	19	21	15	21.375	19.5	15.4286	13.5	18.5	19.5	25.5	12.5	20	13	19.5	13.5	21	19	33	15	18
16	weiblich	545	Primäres Offenwinkelglaukom	linkes Auge	55	3	0	0	6	1	41	30	35	22	35	24	22	24	26	27	8	7	11	11	7	7		10	9	7	28.6	8.55556	29.75	24	8.14286	10	32.5	33.5	25.5	7	29.5	10.5	24	10	31	7	41	22	19
18	männlich	513	Primäres Offenwinkelglaukom	linkes Auge	25	3	0	0	0	1		17	19	18	13	20	13	15	19		6	8	9	6	7	7	9		10	6	16.75	7.55556	16.1667	18.5	7.42857	8	20	21	15.5	8.5	17	9	18.5	8	13	6.5	20	13	7
21	weiblich	507	Primäres Offenwinkelglaukom	linkes Auge	40	3	0	1	0	1	23	24	21	20	19	16	20	19	19	24	15	10	9	10	9	8	8	9	9		20.5	9.66667	20.75	19.5	9.71429	9.5	19.5	20.5	22	9	20	9	19.5	9.5	21.5	9	24	16	8
22	männlich	532	Primäres Offenwinkelglaukom	linkes Auge	46	5	3	1	2	2	25	21	24	23	19	17	22	22	20			21	20	21	20	20	20	21	19		21.4444	20.25	21.4286	21.5	20.3333	20	21	22	19	20.5	23	20.5	21.5	20	19	20	25	17	8
23	männlich	512	Pigmentdispersionsglaukom	linkes Auge	28	4	3	0	5	1	15	16	15	17	14	18	19	18			5	18	6	8	6	10	10	8	7		16.5	8.66667	16.4286	17	9	7.5	16.5	17.5	19.5	14	16.5	7	17	7.5	14	6	19	14	5
29	männlich	539	Primäres Offenwinkelglaukom	linkes Auge	32	3	3	0	3	1		24	26	32	17	21	22	22	25	15	15	7	8	9	7	9	7	8	14		22.6667	9.33333	21	28.5	8.71429	11.5	21	22	20.5	7	24	8	28.5	11.5	16	7	32	15	17
38	männlich	514	Primäres Offenwinkelglaukom	linkes Auge	29	4	4	0	4	1	12	17	12	19	13	16	13		17	11	10		16	17	15	17	17	16	13		14.4444	15.125	13.4286	18	15.1667	15	14	15	15.5	17	12	16	18	15	12	15	19	11	8
41	männlich	508	Primäres Offenwinkelglaukom	linkes Auge	21	3	0	0	0	2	17	20	18	18	12	15	16	13	18			13	12	15	13	14	11	12	15		16.3333	13.125	15.8571	18	12.5	15	16	17	19.5	12	15.5	12	18	15	12	13	20	12	8
42	weiblich	471	Primäres Offenwinkelglaukom	linkes Auge	20	2	0	2	5	1	17	21	17	15	16	17	18	17	17		10	11	9	12	12	10	9	12	17		17.2222	11.3333	17.5714	16	10.4286	14.5	17	18	17.5	10	17	10.5	16	14.5	16	12	21	15	6
44	weiblich	506	Primäres Offenwinkelglaukom	linkes Auge	23	3	4	1	5	1	18	20	18	20	17	21	15	17	18		8	5	10	10	8	8	9	8	11		18.2222	8.55556	18	19	8	10.5	19.5	20.5	17.5	7	17.5	9	19	10.5	17	8	21	15	6
45	weiblich	519	Primäres Offenwinkelglaukom	linkes Auge	23	4	0	0	2	1	16	18	19	21	18	15	14	17	19	15		7	5	10	5	7	6	4	5	5	17.2	6	16.5	20	5.57143	7.5	15.5	16.5	16.5	6.5	18	4.5	20	7.5	16.5	5	21	14	7
47	weiblich	514	Primäres Offenwinkelglaukom	linkes Auge	25	2	0	0	0	1	27	21	18	23	17	14	18	18	14	13	17	14	13	10	15	17	14	15	13		18.3	14.2222	18.25	18.5	15	11.5	20.5	21.5	18	14	18	14	18.5	11.5	15	15	27	13	14
49	weiblich	506	Primäres Offenwinkelglaukom	linkes Auge	28	3	0	0	3	1	16	13	14	13	14	11	15	12	10	11	8	10	12	12	12	12	12	12	17		12.9	11.8889	13.25	11.5	11.1429	14.5	13.5	14.5	13.5	11	13	12	11.5	14.5	12.5	12	16	10	6
50	männlich	576	Primäres Offenwinkelglaukom	linkes Auge	24	1	0	0	0	1	19	13	12	24	15	11	9	15	17	15		10	10	9	7	10	10	11	10		15	9.625	13.625	20.5	9.66667	9.5	15	16	10.5	10	13.5	10.5	20.5	9.5	15	7	24	9	15
53	weiblich	559	Pseudoexfoliationsglaukom	linkes Auge	28	3	0	0	0	1	21	23	16	20	20	25	24	17	21			8	7	5	11	9	6	7	8		20.7778	7.625	20.8571	20.5	8	6.5	23	24	18	7	16.5	7	20.5	6.5	20	11	25	16	9
54	weiblich	472	Primäres Offenwinkelglaukom	linkes Auge	25	3	0	0	5	1	17	16	7	17	10	13	17	8	15		12	16	11	11	12	10	10	15	8		13.3333	11.6667	12.5714	16	12.2857	9.5	15	16	15	13	7.5	13	16	9.5	10	12	17	7	10
56	weiblich	456	Primäres Offenwinkelglaukom	linkes Auge	28	4	0	1	3	1	7	14	14	19	14	13	11	13	14	12	10	8	8	11	10	11	10	8	9	10	13.1	9.5	12.25	16.5	9.375	10	10	11	11	9	13.5	8	16.5	10	13	10	19	7	12
58	männlich	486	Primäres Offenwinkelglaukom	linkes Auge	30	4	0	0	2	2	15	12	13	24	16	13		14	16	14	15		8	8	15	15	14	11	12		15.2222	12.25	13.8571	20	13	10	14	15	12	14	13.5	9.5	20	10	15	15	24	12	12
59	männlich	509	Primäres Offenwinkelglaukom	linkes Auge	22	4	0	1	6	1	15	17	13	20	11	18	15	14	18	12		10	11	14	11	11	11	19	14	10	15.3	12.3333	14.375	19	11.8571	14	16.5	17.5	14.5	10.5	13.5	15	19	14	11.5	10.5	20	11	9
60	weiblich	515	Primäres Offenwinkelglaukom	linkes Auge	24	4	0	0	0	1	30	29	18	31	18	22	27	20		22	20	15	17	16			21	19		19	24.1111	18.1429	23.25	31	18.5	16	26	27	19	18	19	18	31	16	20	19	31	18	13
61	weiblich	527	Primäres Offenwinkelglaukom	linkes Auge	27	2	0	1	4	1	9	12	11	11	16	11	14	13	12	12	10	10	11	13	13	10	9	8	9	11	12.1	10.4	12.25	11.5	10.25	11	10	11	9	9.5	12	9.5	11.5	11	14	12	16	9	7
63	weiblich	498	Primäres Offenwinkelglaukom	linkes Auge	27	2	0	0	1	1	14	15	15	13	21	14	25	11	14	20	17	19	12	15	14	14	15	14	11	12	16.2	14.3	16.875	13.5	14.625	13	14	15	21.5	17	13	13	13.5	13	20.5	13	25	11	14
64	weiblich	508	Primäres Offenwinkelglaukom	linkes Auge	22	3	0	1	5	1	19	16	16	20	16		14	14	16		14	16	13	19	19	18	14	14	17	17	16.375	16.1	15.8333	18	15.625	18	19	20	15	15	15	13.5	18	18	16	18	20	14	6
65	weiblich	506	Primäres Offenwinkelglaukom	linkes Auge	21	3	0	0	1	1	14	14	19	23	16	12	14	17	20		11	11	12	12	11	12	13	12	12		16.5556	11.7778	15.1429	21.5	11.7143	12	13	14	13	12	18	12	21.5	12	16	11	23	12	11
70	weiblich	556	Pigmentdispersionsglaukom	linkes Auge	45	2	0	1	6	1	18	18	17	20	17	15	17	17	12		14	13	13	12	12	14	13	12	12		16.7778	12.7778	17	16	13	12	16.5	17.5	17	13	17	12.5	16	12	17	12	20	12	8
71	weiblich	588	Pseudoexfoliationsglaukom	linkes Auge	50	4	0	1	3	1	21	19	15	16	19	22	24	20	17		11	10	15	15	10	9	8	9	14		19.2222	11.2222	20	16.5	10.2857	14.5	21.5	22.5	16.5	9	17.5	12	16.5	14.5	19	10	24	15	9
74	männlich	556	Primäres Offenwinkelglaukom	linkes Auge	31	4	0	0	6	1	12	19	15	20	10	19	20	9	10		5	5	10	9	6	6	9	8	8	9	14.8889	7.5	14.8571	15	7.25	8.5	15.5	16.5	14.5	7	12	9	15	8.5	10	7.5	20	9	11
75	männlich	493	Primäres Offenwinkelglaukom	linkes Auge	29	1	0	0	3	1	20	19	17	17	13	14	13	15	13	14	7	5	7	9	5	6	8	8	8	7	15.5	7	15.625	15	6.625	8.5	17	18	16.5	6.5	16	7.5	15	8.5	13.5	6	20	13	7
77	weiblich	590	Primäres Offenwinkelglaukom	linkes Auge	23	3	0	2	5	1	15	16	16	21	15	15	13	14	22	13	17		15	17	23	18	17	16	24	18	16	18.3333	14.625	21.5	17.7143	20.5	15	16	15.5	17	15	15.5	21.5	20.5	14	20.5	22	13	9
79	weiblich	546	Pseudoexfoliationsglaukom	linkes Auge	30	4	0	0	0	1	14	23	18	18	25	25		22	19	19	11	13	15	13	13	12	13	13	13		20.3333	12.8889	20.8571	18.5	12.8571	13	19.5	20.5	23	13	20	14	18.5	13	22	13	25	14	11
82	weiblich	550	Primäres Offenwinkelglaukom	linkes Auge	33	4	0	0	0	1	33	34	34	25	17	20	17	22	19		10	10	8	13	11	12	7	7	9		24.5556	9.66667	25.2857	22	9.28571	11	26.5	27.5	22	8.5	28	7.5	22	11	17	11	34	17	17
83	weiblich	513	Pseudoexfoliationsglaukom	linkes Auge	26	4	0	3	4	1	19	16	16	20	17	16	17	16	17		14	13	17	16	14						17.1111	14.8	16.7143	18.5	14.5	16	17.5	18.5	16	13	16	17	18.5	16	17	14	20	16	4
84	weiblich	470	Primäres Offenwinkelglaukom	linkes Auge	34	5	3	3	0	2	17	25	16	25	17	14	26	15	20	13	17	20	14	18	19	23	26	14	17	11	18.8	17.9	17.875	22.5	18	17.5	15.5	16.5	20.5	23	15.5	14	22.5	17.5	15	15	26	13	13
85	weiblich	591	Primäres Offenwinkelglaukom	linkes Auge	23	3	0	1	1	1		22	18	15	19	20	22	22	25	23	8	8		10	10	11	10	10	10		20.6667	9.625	20.8571	20	9.5	10	20	21	22	9	20	10	20	10	21	10	25	15	10
86	männlich	508	Pseudoexfoliationsglaukom	linkes Auge	40	4	0	0	0	1	21	22	21	19	15	16	18	20	21	17	12	10	10	10	14	11	12	13	17	10	19	11.9	18.75	20	11.5	13.5	18.5	19.5	18	11	20.5	11.5	20	13.5	16	12	22	15	7
88	weiblich	501	Primäres Offenwinkelglaukom	linkes Auge	26	1	0	2	6	1	14	16	16	16	14	13	16	17	20		8	7	8	7	8	8	9	8	10	8	15.7778	8.1	15.1429	18	8	8.5	13.5	14.5	16	8	16.5	8	18	8.5	14	8	20	13	7
92	männlich	506	Primäres Offenwinkelglaukom	linkes Auge	32	4	0	1	5	1	18	24	17	14	12	15	19	14	13	14	12	12	12	12	11						16	11.8	16.625	13.5	11.75	12	16.5	17.5	21.5	12	15.5	12	13.5	12	13	11	24	12	12
[truncated: 28 more columns]
